# Supplementary material
Source: ML conference proceedings conference paper supplement (https://proceedings.mlr.press/v89/chen19f.html)
Supplement: Supplementary file [file chen19f-supp.pdf]

## Appendix A Proof of $\mathbf{g}_t^\top(\mathbf{x}_t^* - \mathbf{x}_{t+1}^*) \leq 2\eta\|\mathbf{g}_t\|^2$

**Lemma 6** (Theorem 5.1 in (Hazan, 2016)). *Let  $\mathbf{x}_t^* = \arg \min_{\mathbf{x} \in (1-\alpha)\mathcal{K}} F_t(\mathbf{x})$ . We have  $\mathbf{g}_t^\top(\mathbf{x}_t^* - \mathbf{x}_{t+1}^*) \leq 2\eta\|\mathbf{g}_t\|^2$ .*

*Proof.* We denote the regularizer in line 6 of Algorithm 1 by  $R(\mathbf{x}) \triangleq \|\mathbf{x} - \mathbf{x}_1\|^2$  and define the Bregman divergence with respect the function  $F$  by

$$B_F(\mathbf{x} \parallel \mathbf{y}) = F(\mathbf{x}) - F(\mathbf{y}) - \nabla F(\mathbf{y})^\top(\mathbf{x} - \mathbf{y}). \quad (14)$$

Since  $\mathbf{x}_{t+1}^*$  is a minimizer of  $F_{t+1}$  and  $F_{t+1}$  is convex, we have

$$\begin{aligned} F_{t+1}(\mathbf{x}_t^*) &= F_{t+1}(\mathbf{x}_{t+1}^*) + (\mathbf{x}_t^* - \mathbf{x}_{t+1}^*)^\top \nabla F_{t+1}(\mathbf{x}_{t+1}^*) \\ &\quad + B_{F_{t+1}}(\mathbf{x}_t^* \parallel \mathbf{x}_{t+1}^*) \\ &\geq F_{t+1}(\mathbf{x}_{t+1}^*) + B_{F_{t+1}}(\mathbf{x}_t^* \parallel \mathbf{x}_{t+1}^*) \\ &= F_{t+1}(\mathbf{x}_{t+1}^*) + B_R(\mathbf{x}_t^* \parallel \mathbf{x}_{t+1}^*) \end{aligned}$$

In the last equation, we use the fact that the Bregman divergence is not influenced by the linear terms in  $F$ . Using again the fact that  $\mathbf{x}_t^*$  is the minimizer of  $F_t$ , we further deduce

$$\begin{aligned} B_R(\mathbf{x}_t^* \parallel \mathbf{x}_{t+1}^*) &\leq F_{t+1}(\mathbf{x}_t^*) - F_{t+1}(\mathbf{x}_{t+1}^*) \\ &= (F_t(\mathbf{x}_t^*) - F_t(\mathbf{x}_{t+1}^*)) + \eta \mathbf{g}_t^\top(\mathbf{x}_t^* - \mathbf{x}_{t+1}^*) \\ &\leq \eta \mathbf{g}_t^\top(\mathbf{x}_t^* - \mathbf{x}_{t+1}^*). \end{aligned}$$

On the other hand, applying Taylor's theorem in several variables with the remainder given in Lagrange's form, we know that there exists  $\boldsymbol{\xi}_t \in [\mathbf{x}_t^*, \mathbf{x}_{t+1}^*] \triangleq \{\lambda \mathbf{x}_t^* + (1-\lambda)\mathbf{x}_{t+1}^* : \lambda \in [0, 1]\}$  such that

$$B_R(\mathbf{x}_t^* \parallel \mathbf{x}_{t+1}^*) = \frac{1}{2}(\mathbf{x}_t^* - \mathbf{x}_{t+1}^*)^\top \mathbf{H}(\boldsymbol{\xi}_t)(\mathbf{x}_t^* - \mathbf{x}_{t+1}^*),$$

where  $\mathbf{H}(\boldsymbol{\xi}_t)$  denotes the Hessian matrix of  $R$  at point  $\boldsymbol{\xi}_t$ . Notice that the Hessian matrix of  $R$  is the identity matrix everywhere. Therefore  $B_R(\mathbf{x}_t^* \parallel \mathbf{x}_{t+1}^*) = \frac{1}{2}\|\mathbf{x}_t^* - \mathbf{x}_{t+1}^*\|^2$ . By Cauchy-Schwarz inequality, we obtain

$$\begin{aligned} \mathbf{g}_t^\top(\mathbf{x}_t^* - \mathbf{x}_{t+1}^*) &\leq \|\mathbf{g}_t\| \cdot \|\mathbf{x}_t^* - \mathbf{x}_{t+1}^*\| \\ &= \|\mathbf{g}_t\| \cdot \sqrt{2B_R(\mathbf{x}_t^* \parallel \mathbf{x}_{t+1}^*)} \quad , \\ &\leq \|\mathbf{g}_t\| \cdot \sqrt{2\eta \mathbf{g}_t^\top(\mathbf{x}_t^* - \mathbf{x}_{t+1}^*)} \end{aligned}$$

which immediately yields

$$\mathbf{g}_t^\top(\mathbf{x}_t^* - \mathbf{x}_{t+1}^*) \leq 2\eta\|\mathbf{g}_t\|^2$$

□

## Appendix B Proof of Lemma 4

*Proof.* We verify the inequality when  $t = 1$  or  $2$ . When  $t \geq 3$ , we have

$$(1 + 1/t)^{2/5} \geq 1 \geq \frac{8}{5}t^{-3/5}.$$

Since  $2(1 + 1/t)^{2/5} \geq 2(1 + 1/t)^{1/5}$ , we obtain

$$3(1 + 1/t)^{2/5} \geq 2(1 + 1/t)^{1/5} + \frac{8}{5}t^{-3/5}.$$

Therefore, we have

$$3(1 + 1/t)^{2/5} - 2(1 + 1/t)^{1/5} - \frac{8}{5}t^{-3/5} \geq 0. \quad (15)$$

Let  $g(t) = t^{2/5}$ . Since  $g(t)$  is concave, we have  $g(t+1) - g(t) \leq g'(t)$ , which gives  $(t+1)^{2/5} - t^{2/5} \leq \frac{2}{5}t^{-3/5}$ . Combining the above inequality with (15), we see

$$3(1 + 1/t)^{2/5} - 2(1 + 1/t)^{1/5} + 4t^{2/5} - 4(t+1)^{2/5} \geq 0.$$

Multiplying both sides with  $t^{2/5}$ , we complete the proof. □

## Appendix C Proof of Lemma 5

*Proof.* By the definition of  $\mathbf{g}_{t+1}$ , we have  $\|\mathbf{g}_{t+1}\| \leq nM/\delta$ . It suffices to show  $\sqrt{2D^2\sigma_{t+1}} \geq n\eta M/(2\delta)$ . By the definition of  $\sigma_{t+1}$ ,  $\eta$ , and  $\delta$ , it is equivalent to  $4T^{3/5} - (t+1)^{1/5} \geq 0$ . Since  $1 \leq t \leq T$ , we only need to show  $4T^{3/5} - (T+1)^{1/5} \geq 0$ . We define  $f(T) = 4T^{3/5} - (T+1)^{1/5}$ . Its derivative is  $f'(T) = \frac{12(T+1)^{4/5} - T^{2/5}}{5T^{2/5}(T+1)^{4/5}}$ . We have

$$\frac{12(T+1)^{4/5}}{T^{2/5}} = 12 \left( T + \frac{1}{T} + 2 \right)^{2/5} \geq 12 \cdot 4^{2/5} \geq 1$$

if  $T \geq 1$ . Therefore, we know that  $f'(T) \geq 0$  if  $T \geq 1$ . Thus  $f$  is non-decreasing on  $[1, \infty]$ . This immediately yields  $f(T) \geq f(1) \geq 0$ , which completes the proof. □

## Appendix D Proof of Theorem 2

*Proof.* The regret of Algorithm 2 by the end of the  $t$ -th iteration is at most

$$\begin{aligned} \sum_{m=0}^{\lceil \log_2(t+1) \rceil - 1} \beta(2^m)^{4/5} &= \beta \frac{(2^{\lceil \log_2(t+1) \rceil})^{4/5} - 1}{2^{4/5} - 1} \\ &\leq \frac{\beta}{1 - 2^{-4/5}} (t+1)^{4/5}. \end{aligned}$$

□
